# Supplementary material
Source: publisher figshare collection journal article supplement (https://tandf.figshare.com/articles/dataset/_/11298530)
Supplement: Supplementary file 1 [file 1]

### Appendix 3

**Table 1.** Glucose data used in meta-analysis.

| Reference                                                    | Postprandial concentration – reported units | Comparison (day time, night time) | Day (mean $\pm$ SD*) | Night (mean $\pm$ SD*) |
|--------------------------------------------------------------|---------------------------------------------|-----------------------------------|----------------------|------------------------|
| Al-Naimi et al, 2004                                         | AUC (mmol/l.h)                              | 1300, 0100h                       | 15.3 $\pm$ 1.3       | 17.2 $\pm$ 1.3         |
| Biston et al, 1996                                           | iAUC (mmol/l.min)                           | 0830, 2000h                       | 193 $\pm$ 76.7       | 540 $\pm$ 116.3        |
| Bo et al, 2017                                               | AUC (mg/dl x h)                             | 0800, 2000h                       | 15383 $\pm$ 1585.5   | 17183.3 $\pm$ 1775.5   |
| Gibbs et al, 2015 – <i>Low GI</i>                            | iAUC (mmol/L.h)                             | 0800, 2000h                       | 142.0 $\pm$ 63.7     | 309.0 $\pm$ 63.7       |
| Gibbs et al, 2015 – <i>High GI</i>                           | iAUC (mmol/L.h)                             | 0800, 2000h                       | 218.0 $\pm$ 80.9     | 351.0 $\pm$ 107.9      |
| Gil-Lozano et al, 2015                                       | iAUC (g/dl. 180 min)                        | 1100, 2300h                       | 16.7 $\pm$ 1.3       | 19.0 $\pm$ 1.2         |
| Holmback et al, 2002 <sup>a</sup> – <i>High carbohydrate</i> | iAUC (mmol/L.3h)                            | 1200, 0000h                       | 165.1 $\pm$ 67.5     | 209.6 $\pm$ 38.6       |
| Holmback et al, 2002 – <i>High fat</i>                       | iAUC (mmol/L.3h)                            | 1200, 0000h                       | 123.3 $\pm$ 38.3     | 190.6 $\pm$ 29.8       |
| Leung et al, 2017 – <i>OGTT</i>                              | iAUC (mmol/l.2h)                            | 0800, 2000h                       | 180.4 $\pm$ 88.1     | 357.9 $\pm$ 109.2      |
| Leung et al, 2017 – <i>low GI meal</i>                       | iAUC (mmol/l.3h)                            | 0800, 2000h                       | 66.9 $\pm$ 94.2      | 264.9 $\pm$ 135.0      |
| Owen et al, 1996 <sup>b</sup>                                | iAUC (mmol/l.3h)                            | 0800, 2000h                       | 143.2 $\pm$ 52.1     | 285.5 $\pm$ 143.3      |
| Van Cauter et al, 1992 - <i>12 hour fast</i>                 | 2hr iAUC (mmol/l.min)                       | 0800, 2000h                       | 111.3 $\pm$ 43.2     | 203.5 $\pm$ 34.9       |
| Van Cauter et al, 1992 <sup>b</sup> - <i>6 hour fast</i>     | 2hr iAUC (mmol/l.min)                       | 0800, 2000h                       | 83.9 $\pm$ 28.3      | 195.0 $\pm$ 50.0       |

\* SD (standard deviation) was adjusted with correlation factor (0.4). <sup>a</sup> Plasma glucose levels supplied by Holmback et al, iAUC calculated by the review's authors.

<sup>b</sup> In the original article, authors stated that they were reporting AUC, but from their description of method, it was understood that they reported iAUC.

AUC: area under the curve, iAUC: incremental area under the curve.
