# Supplementary material
Source: publisher figshare collection journal article supplement (https://tandf.figshare.com/articles/dataset/_/11298530)
Supplement: Supplementary file 2 [file 1]

## Appendix 1

### Full search strategy from Ovid MEDLINE

|    | Searches                                                                                                                                                                                                                            | Results |
|----|-------------------------------------------------------------------------------------------------------------------------------------------------------------------------------------------------------------------------------------|---------|
| 1  | exp "diet, food, and nutrition"/ or exp food/                                                                                                                                                                                       | 1421719 |
| 2  | food*.mp. [mp=title, abstract, original title, name of substance word, subject heading word, keyword heading word, protocol supplementary concept word, rare disease supplementary concept word, unique identifier]                 | 437386  |
| 3  | exp Meals/                                                                                                                                                                                                                          | 2300    |
| 4  | meal*.mp. [mp=title, abstract, original title, name of substance word, subject heading word, keyword heading word, protocol supplementary concept word, rare disease supplementary concept word, unique identifier]                 | 52887   |
| 5  | eat*.mp. [mp=title, abstract, original title, name of substance word, subject heading word, keyword heading word, protocol supplementary concept word, rare disease supplementary concept word, unique identifier]                  | 106985  |
| 6  | nutrient*.mp. [mp=title, abstract, original title, name of substance word, subject heading word, keyword heading word, protocol supplementary concept word, rare disease supplementary concept word, unique identifier]             | 85741   |
| 7  | energy*.mp. [mp=title, abstract, original title, name of substance word, subject heading word, keyword heading word, protocol supplementary concept word, rare disease supplementary concept word, unique identifier]               | 401547  |
| 8  | exp energy intake/ or exp portion size/                                                                                                                                                                                             | 38109   |
| 9  | (energy adj3 intake*).mp. [mp=title, abstract, original title, name of substance word, subject heading word, keyword heading word, protocol supplementary concept word, rare disease supplementary concept word, unique identifier] | 44517   |
| 10 | energyintake*.mp. [mp=title, abstract, original title, name of substance word, subject heading word, keyword heading word, protocol supplementary concept word, rare disease supplementary concept word, unique identifier]         | 2       |
| 11 | intake*.mp. [mp=title, abstract, original title, name of substance word, subject heading word, keyword heading word, protocol supplementary concept word, rare disease supplementary concept word, unique identifier]               | 208866  |
| 12 | feed*.mp. [mp=title, abstract, original title, name of substance word, subject heading word, keyword heading word, protocol supplementary concept word, rare disease supplementary concept word, unique identifier]                 | 366091  |
| 13 | snack*.mp. [mp=title, abstract, original title, name of substance word, subject heading word, keyword heading word, protocol                                                                                                        | 4556    |

|           |                                                                                                                                                                                                                                 |         |
|-----------|---------------------------------------------------------------------------------------------------------------------------------------------------------------------------------------------------------------------------------|---------|
|           | supplementary concept word, rare disease supplementary concept word, unique identifier]                                                                                                                                         |         |
| <b>14</b> | nutrition*.mp. [mp=title, abstract, original title, name of substance word, subject heading word, keyword heading word, protocol supplementary concept word, rare disease supplementary concept word, unique identifier]        | 276445  |
| <b>15</b> | beverage*.mp. [mp=title, abstract, original title, name of substance word, subject heading word, keyword heading word, protocol supplementary concept word, rare disease supplementary concept word, unique identifier]         | 29055   |
| <b>16</b> | drink*.mp. [mp=title, abstract, original title, name of substance word, subject heading word, keyword heading word, protocol supplementary concept word, rare disease supplementary concept word, unique identifier]            | 142301  |
| <b>17</b> | glucose.mp. [mp=title, abstract, original title, name of substance word, subject heading word, keyword heading word, protocol supplementary concept word, rare disease supplementary concept word, unique identifier]           | 439405  |
| <b>18</b> | 1 or 2 or 3 or 4 or 5 or 6 or 7 or 8 or 9 or 10 or 11 or 12 or 13 or 14 or 15 or 16 or 17                                                                                                                                       | 2561209 |
| <b>19</b> | night*.mp. [mp=title, abstract, original title, name of substance word, subject heading word, keyword heading word, protocol supplementary concept word, rare disease supplementary concept word, unique identifier]            | 60048   |
| <b>20</b> | (night adj3 time).mp. [mp=title, abstract, original title, name of substance word, subject heading word, keyword heading word, protocol supplementary concept word, rare disease supplementary concept word, unique identifier] | 4607    |
| <b>21</b> | nighttime.mp. [mp=title, abstract, original title, name of substance word, subject heading word, keyword heading word, protocol supplementary concept word, rare disease supplementary concept word, unique identifier]         | 6340    |
| <b>22</b> | nocturnal.mp. [mp=title, abstract, original title, name of substance word, subject heading word, keyword heading word, protocol supplementary concept word, rare disease supplementary concept word, unique identifier]         | 28346   |
| <b>23</b> | diurnal.mp. [mp=title, abstract, original title, name of substance word, subject heading word, keyword heading word, protocol supplementary concept word, rare disease supplementary concept word, unique identifier]           | 19858   |
| <b>24</b> | shift.mp. [mp=title, abstract, original title, name of substance word, subject heading word, keyword heading word, protocol supplementary concept word, rare disease supplementary concept word, unique identifier]             | 163034  |
| <b>25</b> | evening*.mp. [mp=title, abstract, original title, name of substance word, subject heading word, keyword heading word, protocol supplementary concept word, rare disease supplementary concept word, unique identifier]          | 14236   |
| <b>26</b> | (night adj3 work).mp. [mp=title, abstract, original title, name of substance word, subject heading word, keyword heading word,                                                                                                  | 1032    |

|    |                                                                                                                                                                                                                                               |        |
|----|-----------------------------------------------------------------------------------------------------------------------------------------------------------------------------------------------------------------------------------------------|--------|
|    | protocol supplementary concept word, rare disease supplementary concept word, unique identifier]                                                                                                                                              |        |
| 27 | nightwork.mp. [mp=title, abstract, original title, name of substance word, subject heading word, keyword heading word, protocol supplementary concept word, rare disease supplementary concept word, unique identifier]                       | 35     |
| 28 | exp Work Schedule Tolerance/                                                                                                                                                                                                                  | 5669   |
| 29 | (work adj3 tolerance).mp. [mp=title, abstract, original title, name of substance word, subject heading word, keyword heading word, protocol supplementary concept word, rare disease supplementary concept word, unique identifier]           | 5967   |
| 30 | exp biological clocks/ or exp circadian rhythm/                                                                                                                                                                                               | 71939  |
| 31 | (shift adj3 work*).mp. [mp=title, abstract, original title, name of substance word, subject heading word, keyword heading word, protocol supplementary concept word, rare disease supplementary concept word, unique identifier]              | 4419   |
| 32 | shiftwork*.mp. [mp=title, abstract, original title, name of substance word, subject heading word, keyword heading word, protocol supplementary concept word, rare disease supplementary concept word, unique identifier]                      | 578    |
| 33 | (circadian adj3 misalignment*).mp. [mp=title, abstract, original title, name of substance word, subject heading word, keyword heading word, protocol supplementary concept word, rare disease supplementary concept word, unique identifier]  | 161    |
| 34 | (circadian adj3 disorder*).mp. [mp=title, abstract, original title, name of substance word, subject heading word, keyword heading word, protocol supplementary concept word, rare disease supplementary concept word, unique identifier]      | 2032   |
| 35 | (circadian adj3 disturbance).mp. [mp=title, abstract, original title, name of substance word, subject heading word, keyword heading word, protocol supplementary concept word, rare disease supplementary concept word, unique identifier]    | 218    |
| 36 | (circadian adj3 d?sregulation&).mp. [mp=title, abstract, original title, name of substance word, subject heading word, keyword heading word, protocol supplementary concept word, rare disease supplementary concept word, unique identifier] | 90     |
| 37 | exp Sleep Disorders, Circadian Rhythm/                                                                                                                                                                                                        | 1762   |
| 38 | irregular work hour*.mp. [mp=title, abstract, original title, name of substance word, subject heading word, keyword heading word, protocol supplementary concept word, rare disease supplementary concept word, unique identifier]            | 11     |
| 39 | 19 or 20 or 21 or 22 or 23 or 25 or 26 or 27 or 28 or 29 or 30 or 31 or 32 or 33 or 34 or 35 or 36 or 37 or 38                                                                                                                                | 157432 |
| 40 | exp Postprandial Period/                                                                                                                                                                                                                      | 7552   |
| 41 | postprandial.mp. [mp=title, abstract, original title, name of substance word, subject heading word, keyword heading word, protocol                                                                                                            | 19818  |

|           |                                                                                                                                                                                                                               |             |
|-----------|-------------------------------------------------------------------------------------------------------------------------------------------------------------------------------------------------------------------------------|-------------|
|           | supplementary concept word, rare disease supplementary concept word, unique identifier]                                                                                                                                       |             |
| <b>42</b> | post prandial.mp. [mp=title, abstract, original title, name of substance word, subject heading word, keyword heading word, protocol supplementary concept word, rare disease supplementary concept word, unique identifier]   | 2083        |
| <b>43</b> | post meal.mp. [mp=title, abstract, original title, name of substance word, subject heading word, keyword heading word, protocol supplementary concept word, rare disease supplementary concept word, unique identifier]       | 347         |
| <b>44</b> | postmeal.mp. [mp=title, abstract, original title, name of substance word, subject heading word, keyword heading word, protocol supplementary concept word, rare disease supplementary concept word, unique identifier]        | 420         |
| <b>45</b> | postcibal.mp. [mp=title, abstract, original title, name of substance word, subject heading word, keyword heading word, protocol supplementary concept word, rare disease supplementary concept word, unique identifier]       | 119         |
| <b>46</b> | exp Glucose Tolerance Test/                                                                                                                                                                                                   | 30728       |
| <b>47</b> | tolerance test*.mp. [mp=title, abstract, original title, name of substance word, subject heading word, keyword heading word, protocol supplementary concept word, rare disease supplementary concept word, unique identifier] | 41033       |
| <b>48</b> | tolerancetest*.mp. [mp=title, abstract, original title, name of substance word, subject heading word, keyword heading word, protocol supplementary concept word, rare disease supplementary concept word, unique identifier]  | 2           |
| <b>49</b> | 40 or 41 or 42 or 43 or 44 or 45 or 46 or 47 or 48                                                                                                                                                                            | 61049       |
| <b>50</b> | <b>18 and 39 and 49</b>                                                                                                                                                                                                       | <b>1515</b> |
