# Supplementary material
Source: publisher figshare collection journal article supplement (https://tandf.figshare.com/articles/dataset/_/11298530)
Supplement: Supplementary file 3 [file 1]

## Appendix 5

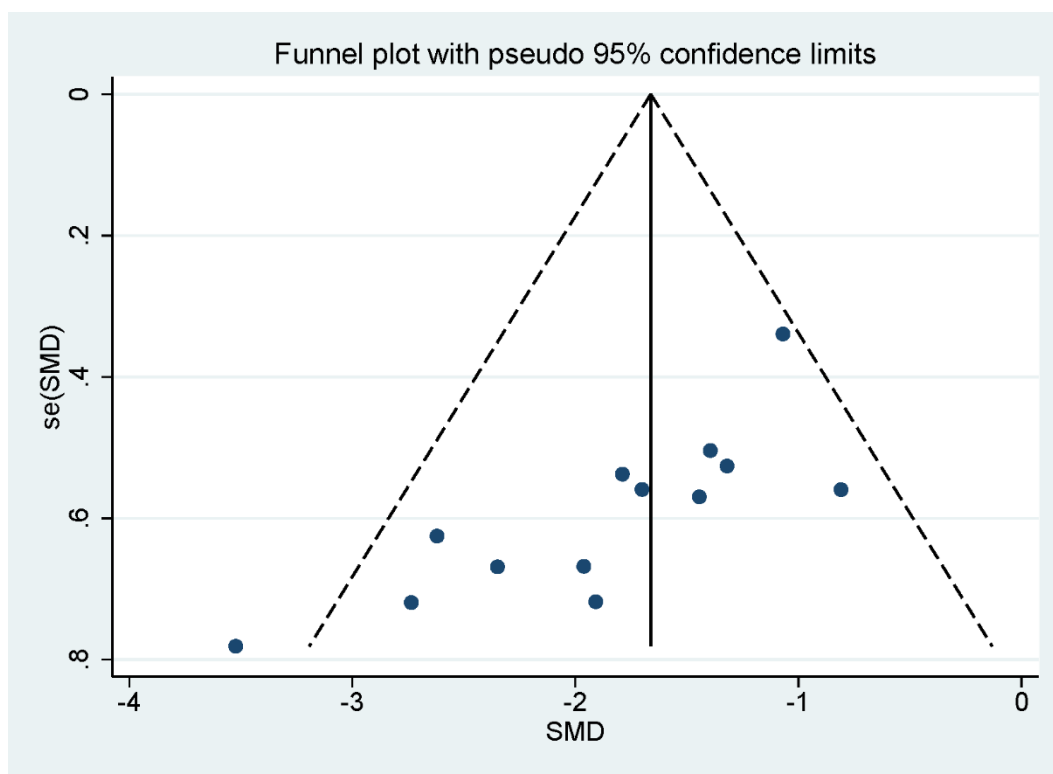

**Figure 1.** Funnel plot for glucose meta-analysis.

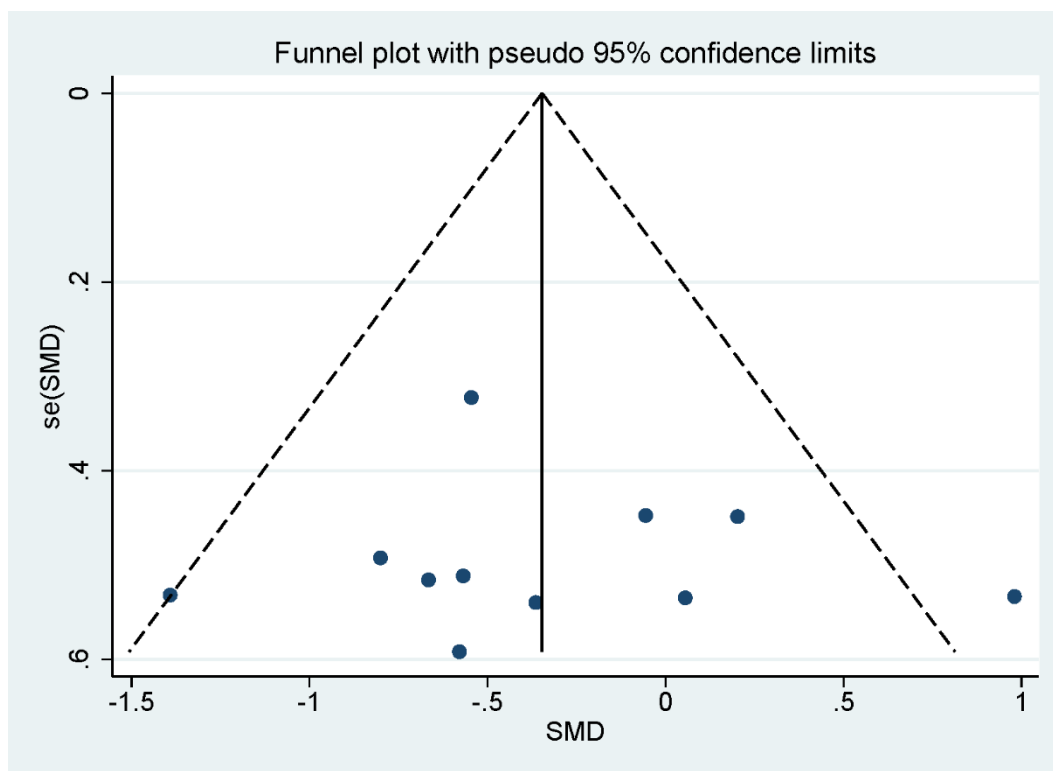

**Figure 2.** Funnel plot for insulin meta-analysis.
