# Supplementary material
Source: publisher figshare collection journal article supplement (https://tandf.figshare.com/articles/dataset/_/11298530)
Supplement: Supplementary file 4 [file 1]

**Appendix 2a. Quality assessment of studies included in meta-analyses of the systematic literature review.**

| <b>ADA Quality Checklist Criteria</b>                                                                                                               | <b>Al-Naimi 2004</b> | <b>Biston 1996</b> | <b>Bo 2017</b>  | <b>Gibbs 2014</b> | <b>Gil-Lozano 2015</b> | <b>Holmback 2002</b> | <b>Holmback 2003</b> | <b>Leung 2017</b> | <b>Owens 1996</b> | <b>Van Cauter 1992</b> |
|-----------------------------------------------------------------------------------------------------------------------------------------------------|----------------------|--------------------|-----------------|-------------------|------------------------|----------------------|----------------------|-------------------|-------------------|------------------------|
| 1. Was the research question clearly stated?                                                                                                        | ✓                    | ✓                  | ✓               | ✓                 | ✓                      | ✓                    | ✓                    | ✓                 | ✓                 | ✓                      |
| 2. Was the selection of study subjects/patients free from bias?                                                                                     | x                    | ✓                  | ✓               | ✓                 | ✓                      | ✓                    | ✓                    | ✓                 | x                 | ✓                      |
| 3. Were the study groups comparable?                                                                                                                | ✓                    | ✓                  | ✓               | ✓                 | ✓                      | ✓                    | ✓                    | ✓                 | ✓                 | ✓                      |
| 4. Was the method of handling withdrawals described?                                                                                                | x                    | x                  | x               | ✓                 | x                      | ✓                    | ✓                    | ✓                 | x                 | x                      |
| 5. Was blinding used to prevent introduction to bias?                                                                                               | ✓                    | ✓                  | ✓               | ✓                 | ✓                      | ✓                    | ✓                    | ✓                 | ✓                 | ✓                      |
| 6. Were intervention/therapeutic regimens/exposure factor or procedure and any comparisons described in detail? Were intervening factors described? | ✓                    | ✓                  | ✓               | ✓                 | ✓                      | ✓                    | ✓                    | ✓                 | ✓                 | x                      |
| 7. Were outcomes clearly defined and the measurements valid and reliable?                                                                           | ✓                    | ✓                  | ✓               | ✓                 | ✓                      | ✓                    | ✓                    | ✓                 | ✓                 | ✓                      |
| 8. Was the statistical analysis appropriate for the study design and type of outcome indicators?                                                    | x                    | ✓                  | ✓               | ✓                 | ✓                      | ✓                    | ✓                    | ✓                 | ✓                 | ✓                      |
| 9. Were conclusions supported by results with biases and limitations also taken into consideration?                                                 | x                    | ✓                  | ✓               | ✓                 | ✓                      | ✓                    | x                    | ✓                 | ✓                 | ✓                      |
| 10. Is bias due to the study's findings or sponsorship unlikely?                                                                                    | ✓                    | ✓                  | ✓               | ✓                 | ✓                      | ✓                    | ✓                    | ✓                 | ✓                 | ✓                      |
| <b>Quality Rating</b>                                                                                                                               | <b>Neutral</b>       | <b>Positive</b>    | <b>Positive</b> | <b>Positive</b>   | <b>Positive</b>        | <b>Positive</b>      | <b>Positive</b>      | <b>Positive</b>   | <b>Neutral</b>    | <b>Neutral</b>         |

Grey indicates validity items that must be satisfied for a positive quality rating.

Quality rating based on Academy of Nutrition and Dietetics (formerly American Dietetic Association) guidelines (2003a).

**Appendix 2b. Quality assessment of studies included in qualitative synthesis and excluded in the systematic literature review.**

| <b>ADA Quality Checklist Criteria</b>                                                                                                               | Aparicio 1974  | Lund 2001      | Morris 2015    | Morris 2016    | King 1993      | Van Gent 1979   | Terpstra 1979   |
|-----------------------------------------------------------------------------------------------------------------------------------------------------|----------------|----------------|----------------|----------------|----------------|-----------------|-----------------|
| 1. Was the research question clearly stated?                                                                                                        | ✓              | ✓              | ✓              | ✓              | ✓              | ✓               | ✓               |
| 2. Was the selection of study subjects/patients free from bias?                                                                                     | x              | x              | x              | x              | x              | x               | x               |
| 3. Were the study groups comparable?                                                                                                                | ✓              | ✓              | ✓              | ✓              | ✓              | ✓               | ✓               |
| 4. Was the method of handling withdrawals described?                                                                                                | x              | x              | x              | x              | x              | x               | x               |
| 5. Was blinding used to prevent introduction to bias?                                                                                               | ✓              | ✓              | ✓              | ✓              | ✓              | ✓               | ✓               |
| 6. Were intervention/therapeutic regimens/exposure factor or procedure and any comparisons described in detail? Were intervening factors described? | ✓              | ✓              | ✓              | ✓              | ✓              | x               | x               |
| 7. Were outcomes clearly defined and the measurements valid and reliable?                                                                           | ✓              | ✓              | x              | x              | ✓              | x               | x               |
| 8. Was the statistical analysis appropriate for the study design and type of outcome indicators?                                                    | x              | ✓              | ✓              | ✓              | ✓              | x               | x               |
| 9. Were conclusions supported by results with biases and limitations also taken into consideration?                                                 | x              | x              | ✓              | ✓              | x              | x               | x               |
| 10. Is bias due to the study's findings or sponsorship unlikely?                                                                                    | ✓              | ✓              | ✓              | ✓              | ✓              | ✓               | ✓               |
| <b>Quality Rating</b>                                                                                                                               | <b>Neutral</b> | <b>Neutral</b> | <b>Neutral</b> | <b>Neutral</b> | <b>Neutral</b> | <b>Negative</b> | <b>Negative</b> |

Grey indicates validity items that must be satisfied for a positive quality rating.

Quality rating based on Academy of Nutrition and Dietetics (formerly American Dietetic Association) guidelines (2003a).
