# Supplementary material
Source: publisher figshare collection journal article supplement (https://tandf.figshare.com/articles/dataset/_/11298530)
Supplement: Supplementary file 5 [file 1]

## Appendix 4

**Table 1.** Insulin data used in meta-analysis.

| Reference                                                    | Postprandial concentration<br>– reported units | Comparison<br>(day time,<br>night time) | Day<br>(mean $\pm$ SD*) | Night<br>(mean $\pm$ SD*) |
|--------------------------------------------------------------|------------------------------------------------|-----------------------------------------|-------------------------|---------------------------|
| Al-Naimi et al, 2004                                         | AUC (pmol/l.h)                                 | 1300, 0100h                             | 699 $\pm$ 153.2         | 550 $\pm$ 150.9           |
| Biston et al, 1996                                           | iAUC (nmol/l.min)                              | 0830, 2000h                             | 35.4 $\pm$ 8.3          | 44.6 $\pm$ 14.0           |
| Bo et al, 2017                                               | AUC ( $\mu$ U/ml x h)                          | 0800, 2000h                             | 6968.9 $\pm$ 2323.9     | 8597.8 $\pm$ 3525.9       |
| Gibbs et al, 2015 - <i>Low GI</i>                            | iAUC (pmol/L.h)                                | 0800, 2000h                             | 1356 $\pm$ 1080.4       | 1077 $\pm$ 1623.3         |
| Gibbs et al, 2015 - <i>High GI</i>                           | iAUC (pmol/L.h)                                | 0800, 2000h                             | 1159 $\pm$ 1723.4       | 1236 $\pm$ 917.1          |
| Gil-Lozano et al, 2015                                       | iAUC (ng/ml.120min)                            | 1100, 2300h                             | 52.7 $\pm$ 21.2         | 64.3 $\pm$ 18.8           |
| Holmback et al, 2003 <sup>a</sup> – <i>High carbohydrate</i> | iAUC (mU/L.3h)                                 | 1200, 0000h                             | 2955.6 $\pm$ 1102.0     | 2900.5 $\pm$ 878.8        |
| Holmback et al, 2003 – <i>High fat</i>                       | iAUC (mU/L.3h)                                 | 1200, 0000h                             | 2516.6 $\pm$ 782.5      | 2792.8 $\pm$ 734.3        |
| Leung et al, 2017 – <i>low GI</i>                            | iAUC (mU/L.3h)                                 | 0800, 2000h                             | 1930.5 $\pm$ 818.2      | 3051.7 $\pm$ 793.1        |
| Van Cauter et al, 1992 - <i>12 hour fast</i>                 | 2hr iAUC (nmol/L.min)                          | 0800, 2000h                             | 15.0 $\pm$ 3.6          | 17.7 $\pm$ 4.5            |
| Van Cauter et al, 1992 <sup>b</sup> - <i>6 hour fast</i>     | 2hr iAUC (nmol/L.min)                          | 0800, 2000h                             | 13.3 $\pm$ 2.9          | 15.6 $\pm$ 5.0            |

\* SD (standard deviation) was adjusted with correlation factor (0.3). <sup>a</sup> Plasma insulin levels supplied by Holmback et al, iAUC calculated by the review's authors.

<sup>b</sup> In the original article, authors stated that they were reporting AUC, but from their description of method, it was understood that they reported iAUC.

AUC: area under the curve, iAUC: incremental area under the curve.
