# Supplementary material
Source: publisher figshare collection journal article supplement (https://tandf.figshare.com/articles/dataset/_/11298530)
Supplement: Supplementary file 6 [file 1]

## Appendix 7a – Sensitivity analysis for glucose response, substituting morning time points with afternoon time points where available.

**Figure 1.** Forest plot of the glucose sensitivity analysis.

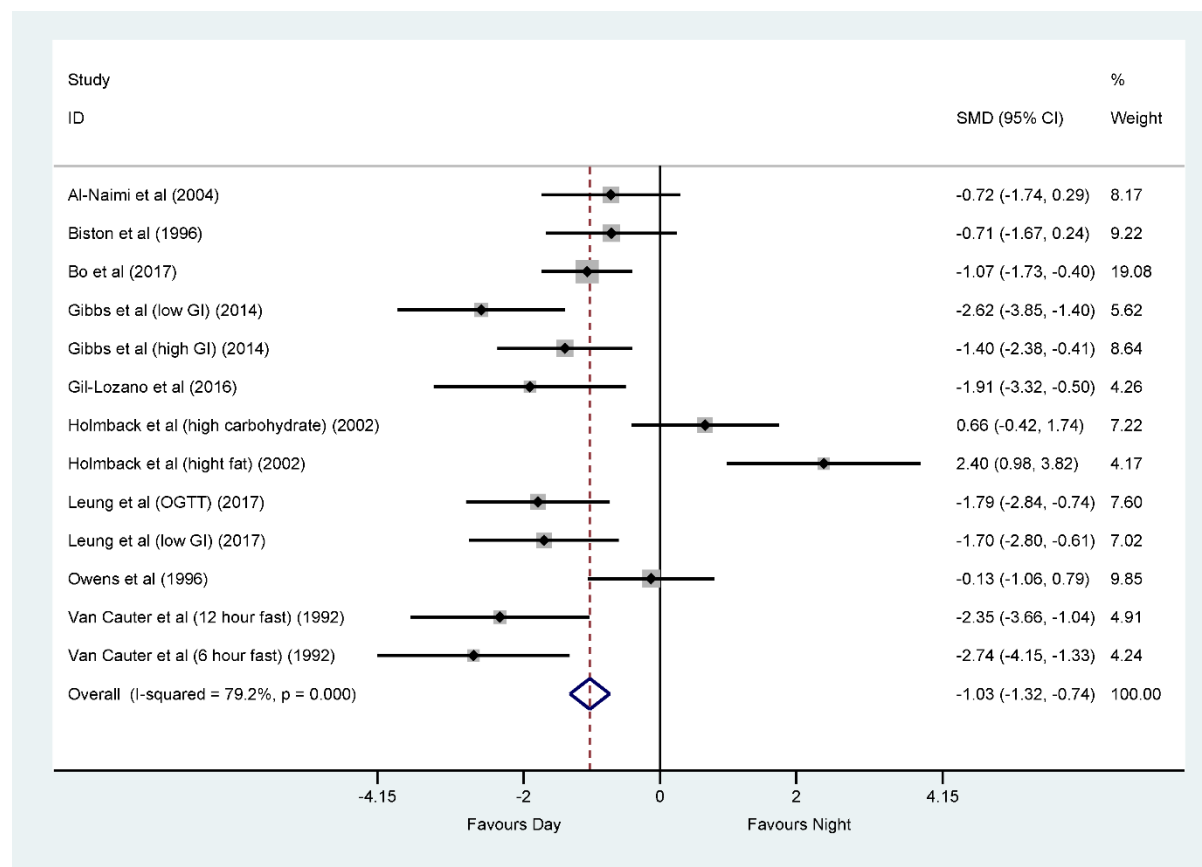

**Table 1.** Glucose data used in the sensitivity analysis. The comparisons shaded in grey were replaced by later day time points provided by the study.

| Reference                                                     | Postprandial concentration – reported units | Comparison (day time, night time) | Day (mean $\pm$ SD*) | Night (mean $\pm$ SD*) |
|---------------------------------------------------------------|---------------------------------------------|-----------------------------------|----------------------|------------------------|
| Al-Naimi et al, 2004                                          | AUC (mmol/l.h)                              | 1300, 0100h                       | 15.3 $\pm$ 1.3       | 17.2 $\pm$ 1.3         |
|                                                               |                                             | 1600, 0400h                       | 15.5 $\pm$ 0.9       | 16.5 $\pm$ 1.8         |
| Biston et al, 1996                                            | iAUC (mmol/l.min)                           | 0830, 2000h                       | 193 $\pm$ 76.7       | 540 $\pm$ 116.3        |
|                                                               |                                             | 1400, 2000h                       | 457 $\pm$ 116.3      | 540 $\pm$ 116.3        |
| Bo et al, 2017                                                | AUC (mg/dl x h)                             | 0800, 2000h                       | 15383 $\pm$ 1585.5   | 17183.3 $\pm$ 1775.5   |
| Gibbs et al, 2015 - <i>Low GI</i>                             | iAUC (mmol/L.h)                             | 0800, 2000h                       | 142.0 $\pm$ 63.7     | 309.0 $\pm$ 63.7       |
| Gibbs et al, 2015 - <i>High GI</i>                            | iAUC (mmol/L.h)                             | 0800, 2000h                       | 218.0 $\pm$ 80.9     | 351.0 $\pm$ 107.9      |
| Gil-Lozano et al, 2015                                        | iAUC (g/dl. 180 min)                        | 1100, 2300h                       | 16.7 $\pm$ 1.3       | 19.0 $\pm$ 1.2         |
| Holmback et al, 2002 <sup>a</sup><br><i>High carbohydrate</i> | iAUC (mmol/L.3h)                            | 1200, 0000h                       | 165.1 $\pm$ 67.5     | 209.6 $\pm$ 38.6       |
|                                                               |                                             | 1600, 0400h                       | 225.1 $\pm$ 49.1     | 190.0 $\pm$ 56.6       |
| Holmback et al, 2002<br><i>High fat</i>                       | iAUC (mmol/L.3h)                            | 1200, 0000h                       | 123.3 $\pm$ 38.3     | 190.6 $\pm$ 29.8       |
|                                                               |                                             | 1600, 0400h                       | 229.4 $\pm$ 32.9     | 149.8 $\pm$ 33.4       |
| Leung et al, 2017 – <i>OGTT</i>                               | iAUC (mmol/l.2h)                            | 0800, 2000h                       | 180.4 $\pm$ 88.1     | 357.9 $\pm$ 109.2      |
| Leung et al, 2017 – <i>low GI meal</i>                        | iAUC (mmol/l.3h)                            | 0800, 2000h                       | 66.9 $\pm$ 94.2      | 264.9 $\pm$ 135.0      |
| Owen et al, 1996 <sup>b</sup>                                 | iAUC (mmol/l.3h)                            | 0800, 2000h                       | 143.2 $\pm$ 52.1     | 285.5 $\pm$ 143.3      |
|                                                               |                                             | 1400, 0200h                       | 226.1 $\pm$ 85.1     | 238.4 $\pm$ 100.7      |
| Van Cauter et al, 1992 - <i>12 hour fast</i>                  | 2hr iAUC (mmol/l.min)                       | 0800, 2000h                       | 111.3 $\pm$ 43.2     | 203.5 $\pm$ 34.9       |
| Van Cauter et al, 1992 <sup>b</sup> - <i>6 hour fast</i>      | 2hr iAUC (mmol/l.min)                       | 0800, 2000h                       | 83.9 $\pm$ 28.3      | 195.0 $\pm$ 50.0       |

\* SD (standard deviation) was adjusted with correlation factor (0.4). <sup>a</sup> Plasma glucose levels supplied by Holmback et al, iAUC calculated by the review's authors.

<sup>b</sup> In the original article, authors stated that they were reporting AUC, but from their description of method, it was understood that they reported iAUC.

AUC: area under the curve, iAUC: incremental area under the curve

## Appendix 7b – Sensitivity analysis for insulin response, substituting morning time points with afternoon time points where available.

**Figure 2.** Forest plot of the insulin sensitivity analysis.

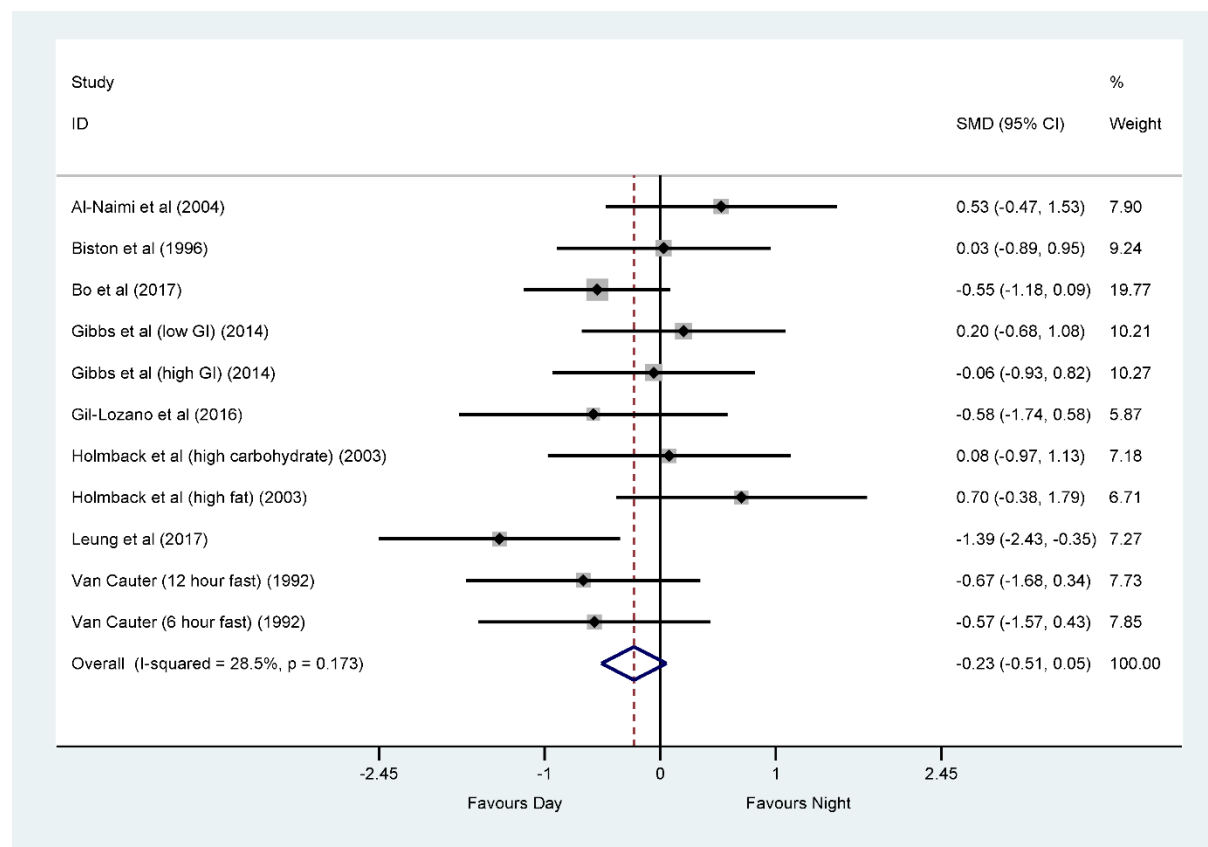

**Table 2.** Insulin data used in the sensitivity analysis. The comparisons shaded in grey were replaced by later day time points provided by the study.

| Reference                                                     | Postprandial concentration<br>– reported units | Comparison<br>(day time,<br>night time) | Day<br>(mean $\pm$ SD*) | Night<br>(mean $\pm$ SD*) |
|---------------------------------------------------------------|------------------------------------------------|-----------------------------------------|-------------------------|---------------------------|
| Al-Naimi et al, 2004                                          | AUC (pmol/l.h)                                 | 1300, 0100h                             | 699 $\pm$ 153.2         | 550 $\pm$ 150.9           |
|                                                               |                                                | 1600, 0400h                             | 452 $\pm$ 148.5         | 384 $\pm$ 106.1           |
| Biston et al, 1996                                            | iAUC (nmol/l.min)                              | 0830, 2000h                             | 35.4 $\pm$ 8.3          | 44.6 $\pm$ 14.0           |
|                                                               |                                                | 1400, 2000h                             | 45.0 $\pm$ 13.5         | 44.6 $\pm$ 14.0           |
| Bo et al, 2017                                                | AUC ( $\mu$ U/ml x h)                          | 0800, 2000h                             | 6968.9 $\pm$ 2323.9     | 8597.8 $\pm$ 3525.9       |
| Gibbs et al, 2015 - <i>Low GI</i>                             | iAUC (pmol/L.h)                                | 0800, 2000h                             | 1356 $\pm$ 1080.4       | 1077 $\pm$ 1623.3         |
| Gibbs et al, 2015 - <i>High GI</i>                            | iAUC (pmol/L.h)                                | 0800, 2000h                             | 1159 $\pm$ 1723.4       | 1236 $\pm$ 917.1          |
| Gil-Lozano et al, 2015                                        | iAUC (ng/ml.120min)                            | 1100, 2300h                             | 52.7 $\pm$ 21.2         | 64.3 $\pm$ 18.8           |
| Holmback et al, 2003 <sup>a</sup><br><i>High carbohydrate</i> | iAUC (mU/L.3h)                                 | 1200, 0000h                             | 2955.6 $\pm$ 1102.0     | 2900.5 $\pm$ 878.8        |
|                                                               |                                                | 1600, 0400h                             | 3603.6 $\pm$ 1379.5     | 3495.0 $\pm$ 1417.1       |
| Holmback et al, 2003<br><i>High fat</i>                       | iAUC (mU/L.3h)                                 | 1200, 0000h                             | 2516.6 $\pm$ 782.5      | 2792.8 $\pm$ 734.3        |
|                                                               |                                                | 1600, 0400h                             | 3332.4 $\pm$ 876.7      | 2739.4 $\pm$ 809.1        |
| Leung et al, 2017 – <i>low GI</i>                             | iAUC (mU/L.3h)                                 | 0800, 2000h                             | 1930.5 $\pm$ 818.2      | 3051.7 $\pm$ 793.1        |
| Van Cauter et al, 1992 - <i>12 hour fast</i>                  | 2hr iAUC (nmol/L.min)                          | 0800, 2000h                             | 15.0 $\pm$ 3.6          | 17.7 $\pm$ 4.5            |
| Van Cauter et al, 1992 <sup>b</sup> - <i>6 hour fast</i>      | 2hr iAUC (nmol/L.min)                          | 0800, 2000h                             | 13.3 $\pm$ 2.9          | 15.6 $\pm$ 5.0            |

\* SD (standard deviation) was adjusted with correlation factor (0.3). <sup>a</sup>Plasma insulin levels supplied by Holmback et al, iAUC calculated by the review's authors.

<sup>b</sup> In the original article, authors stated that they were reporting AUC, but from their description of method, it was understood that they reported iAUC.

AUC: area under the curve, iAUC: incremental area under the curve.
