# Supplementary material
Source: publisher figshare collection journal article supplement (https://tandf.figshare.com/articles/dataset/_/11298530)
Supplement: Supplementary file 7 [file 1]

Archive with 7 entries (7 files):
- ICBI_A_1683856_Appendix1.pdf
- ICBI_A_1683856_Appendix2.pdf
- ICBI_A_1683856_Appendix3.pdf
- ICBI_A_1683856_Appendix4.pdf
- ICBI_A_1683856_Appendix5.pdf
- ICBI_A_1683856_Appendix6.pdf
- ICBI_A_1683856_Appendix7.pdf
