# Supplementary material
Source: publisher figshare collection journal article supplement (https://tandf.figshare.com/articles/dataset/_/11298530)
Supplement: Supplementary file 7 [file 1 › ICBI_A_1683856_Appendix6.pdf]

## Appendix 6

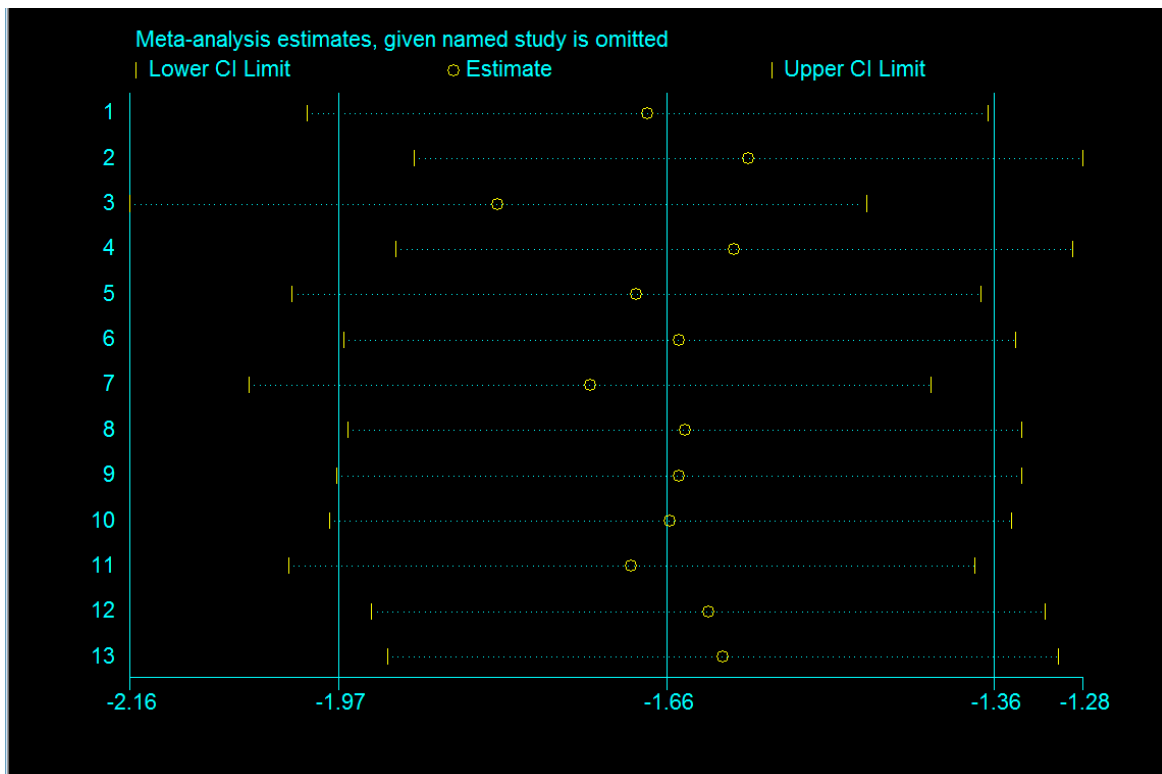

**Figure 1.** Take-one-out sensitivity analysis for glucose.

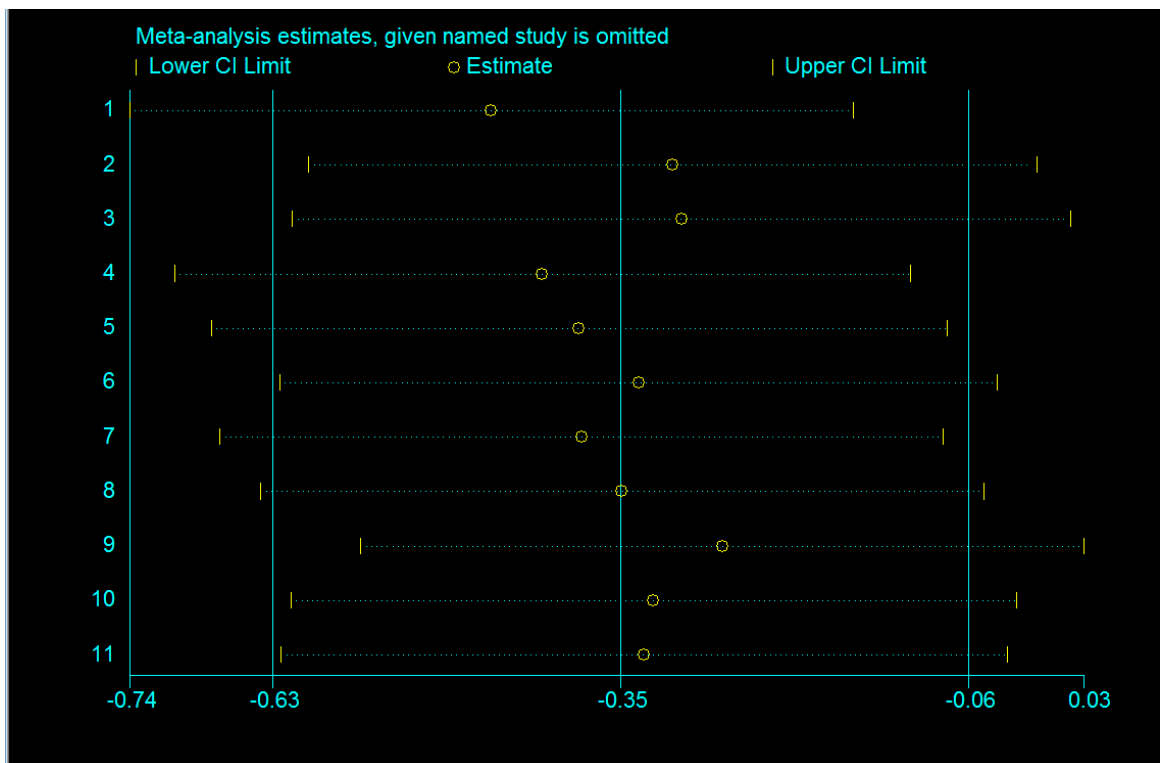

**Figure 2.** Take-one-out sensitivity analysis for insulin.
